# Supplementary material for: Risks and Benefits of Early Rhythm Control in Patients With Acute Strokes and Atrial Fibrillation: A Multicenter, Prospective, Randomized Study (the RAFAS Trial)
Source: PubMed Central journal article supplement — J Am Heart Assoc. 2022 Jan 19;11(3):e023391. doi: 10.1161/JAHA.121.023391 (PMC9238486; doi:10.1161/jaha.121.023391), 2022-01-19

# **SUPPLEMENTAL MATERIAL**

**RAFAS Investigators:**

Junbeom Park<sup>1</sup>, Jaemin Shim<sup>2</sup>, Jung Myung Lee<sup>3</sup>, Jin-Kyu Park<sup>4</sup>, JoonNyung Heo<sup>5</sup>,  
Yoonkyung Chang<sup>1</sup>, Tae-Jin Song<sup>1</sup>, Dong-Hyeok Kim<sup>1</sup>, Hee Tae Yu<sup>5</sup>, Tae-Hoon Kim<sup>5</sup>, Jae-  
Sun Uhm<sup>5</sup>, Young Dae Kim<sup>5</sup>, Hyo Suk Nam<sup>5</sup>, Boyoung Joung<sup>5</sup>, Moon-Hyoung Lee<sup>5</sup>, Ji Hoe  
Heo<sup>5</sup>, Hui-Nam Pak<sup>5</sup>

<sup>1</sup>Ewha Womans University Medical Center, Seoul, Korea

<sup>2</sup>Korea University Medical Center, Seoul, Korea

<sup>3</sup>Kyung Hee University, Seoul, Korea

<sup>4</sup>Hanyang University, Seoul, Korea

<sup>5</sup>Yonsei University Health System, Seoul, Korea

**Table S1. Several causes of crossover.**

|                                                | <b>Number of Causes (n)</b> |
|------------------------------------------------|-----------------------------|
| <b>Early Rhythm Control to Usual Care</b>      | <b>15</b>                   |
| Follow-up loss                                 | 4                           |
| Infection (pneumonia, urinary tract infection) | 5                           |
| Gastrointestinal bleeding                      | 2                           |
| Chest pain (angina), coronary stent insertion  | 2                           |
| History of sick sinus syndrome                 | 1                           |
| Interstitial lung disease                      | 1                           |

**Table S2. Primary/secondary outcomes (per-protocol analysis: exclusion of 25 crossover patients)**

|                                               | <b>Early Rhythm Control (n=166)</b> | <b>Usual Care (n=85)</b> | <b>HR</b>    | <b>95% CI</b>      | <b>P-Value</b> |
|-----------------------------------------------|-------------------------------------|--------------------------|--------------|--------------------|----------------|
| <b>Primary Outcome*</b>                       |                                     |                          |              |                    |                |
| Recurrent stroke in 3 months (n, %)           | 2 (1.2%)                            | 4 (4.7%)                 | 0.244        | 0.045~1.334        | 0.104          |
| Recurrent stroke in 12 months (n, %)          | 3 (1.8%)                            | 6 (7.1%)                 | <b>0.236</b> | <b>0.059~0.943</b> | <b>0.041</b>   |
| <b>Secondary Outcome#</b>                     |                                     |                          |              |                    |                |
| Composite outcome in 3 months (n, %)          | 16 (9.6%)                           | 10 (11.8%)               | 0.794        | 0.360~1.749        | 0.566          |
| Composite outcome in 12 months (n, %)         | 22 (13.3%)                          | 16 (18.8%)               | 0.665        | 0.349~1.267        | 0.215          |
| Arrhythmia-related events in 3 months (n, %)  | 2 (1.2%)                            | 0 (0%)                   | NA           | NA                 | NA             |
| Arrhythmia-related events in 12 months (n, %) | 4 (2.4%)                            | 1 (1.2%)                 | 1.919        | 0.214~17.176       | 0.560          |

\*Primary; recurrent ischemic stroke (IS), recurrent IS in 3 and 12 months, respectively

#Secondary; a composite of death from any cause or hospitalization for any cause, recurrent stroke, arrhythmia-related events

**Table S3. Primary/Secondary outcomes (on-treated analysis)**

|                                               | <b>Early Rhythm Control (n=176)</b> | <b>Usual Care (n=97)</b> | <b>HR</b> | <b>95% CI</b> | <b>P-value</b> |
|-----------------------------------------------|-------------------------------------|--------------------------|-----------|---------------|----------------|
| <b>Primary Outcome*</b>                       |                                     |                          |           |               |                |
| Recurrent stroke in 3 months (n, %)           | 2 (1.1%)                            | 4 (4.1%)                 | 0.262     | 0.048~1.433   | 0.122          |
| Recurrent stroke in 12 months (n, %)          | 3 (1.7%)                            | 6 (6.2%)                 | 0.253     | 0.063~1.013   | 0.052          |
| <b>Secondary Outcome#</b>                     |                                     |                          |           |               |                |
| Composite outcome in 3 months (n, %)          | 16 (9.1%)                           | 13 (13.4%)               | 0.653     | 0.314~1.357   | 0.254          |
| Composite outcome in 12 months (n, %)         | 22 (12.5%)                          | 19 (19.6%)               | 0.597     | 0.323~1.103   | 0.100          |
| Arrhythmia-related events in 3 months (n, %)  | 2 (1.1%)                            | 1 (1.0%)                 | 1.066     | 0.097~11.76   | 0.958          |
| Arrhythmia-related events in 12 months (n, %) | 4 (2.3%)                            | 2 (2.1%)                 | 1.027     | 0.188~5.612   | 0.975          |

\*Primary; recurrent ischemic stroke (IS), recurrent IS in 3 and 12 months, respectively

#Secondary; a composite of death from any cause or hospitalization for any cause, recurrent stroke, arrhythmia-related events

**Table S4. Multivariate Cox regression analysis of secondary outcomes (12-month follow-up)**

| Composite Outcome Post-stroke 12 Months     | Univariate |             |         | Multivariate |             |         |
|---------------------------------------------|------------|-------------|---------|--------------|-------------|---------|
|                                             | HR         | 95% CI      | P-Value | HR           | 95% CI      | P-Value |
| Age                                         | 1.082      | 1.031~1.135 | 0.001   | 1.062        | 1.012~1.114 | 0.014   |
| Male                                        | 1.049      | 0.556~1.981 | 0.882   |              |             |         |
| Paroxysmal AF                               | 0.764      | 0.414~1.412 | 0.391   |              |             |         |
| Body mass index                             | 0.920      | 0.829~1.020 | 0.114   |              |             |         |
| The use of NOAC                             | 0.302      | 0.147~0.617 | 0.001   | 0.361        | 0.174~0.748 | 0.006   |
| Creatinine                                  | 0.922      | 0.545~1.558 | 0.761   |              |             |         |
| NIH stroke scale                            | 1.102      | 1.057~1.149 | <0.001  | 1.08         | 1.034~1.129 | 0.001   |
| CHA <sub>2</sub> DS <sub>2</sub> VASc Score | 1.296      | 1.045~1.607 | 0.018   |              |             |         |
| Congestive heart failure                    | 1.456      | 0.518~4.090 | 0.476   |              |             |         |
| Hypertension                                | 1.236      | 0.617~2.474 | 0.550   |              |             |         |
| Diabetes                                    | 1.112      | 0.581~2.129 | 0.749   |              |             |         |
| Vascular disease                            | 2.141      | 0.839~5.465 | 0.111   |              |             |         |
|                                             |            |             |         |              |             |         |
| Early rhythm Control                        | 0.808      | 0.431~1.513 | 0.505   | 0.855        | 0.448~1.632 | 0.635   |

AF; atrial fibrillation, NOAC; non-vitamin K antagonist, NIH; National Institute of Health

**Table S5. The effect of early rhythm control on primary and secondary outcomes by AF type and sex**

| <b>Outcome</b>                        | <b>Type of AF</b> | <b>HR</b> | <b>95% CI</b> | <b>P-value</b> | <b>P for interaction between intervention (early rhythm control vs. Usual control) and type of AF</b> |
|---------------------------------------|-------------------|-----------|---------------|----------------|-------------------------------------------------------------------------------------------------------|
| <b>Recurrent stroke in 12 months</b>  | Persistent AF     | 0.266     | 0.024~2.931   | 0.279          | 0.938                                                                                                 |
|                                       | Paroxysmal AF     | 0.235     | 0.043~1.287   | 0.095          |                                                                                                       |
| <b>Composite outcome in 12 months</b> | Persistent AF     | 0.971     | 0.407~2.315   | 0.948          | 0.545                                                                                                 |
|                                       | Paroxysmal AF     | 0.651     | 0.262~1.620   | 0.356          |                                                                                                       |
| <b>Outcome</b>                        | <b>Sex</b>        | <b>HR</b> | <b>95% CI</b> | <b>P-value</b> | <b>P for interaction between intervention (early rhythm control vs. Usual control) and sex</b>        |
| <b>Recurrent stroke in 12 months</b>  | Female            | 0.474     | 0.030~7.578   | 0.598          | 0.624                                                                                                 |
|                                       | Male              | 0.208     | 0.040~1.073   | 0.061          |                                                                                                       |
| <b>Composite outcome in 12 months</b> | Female            | 0.994     | 0.340~2.908   | 0.991          | 0.631                                                                                                 |
|                                       | Male              | 0.722     | 0.332~1.572   | 0.412          |                                                                                                       |

**Figure S1. Type of anti-arrhythmic drug use according to the assigned groups**

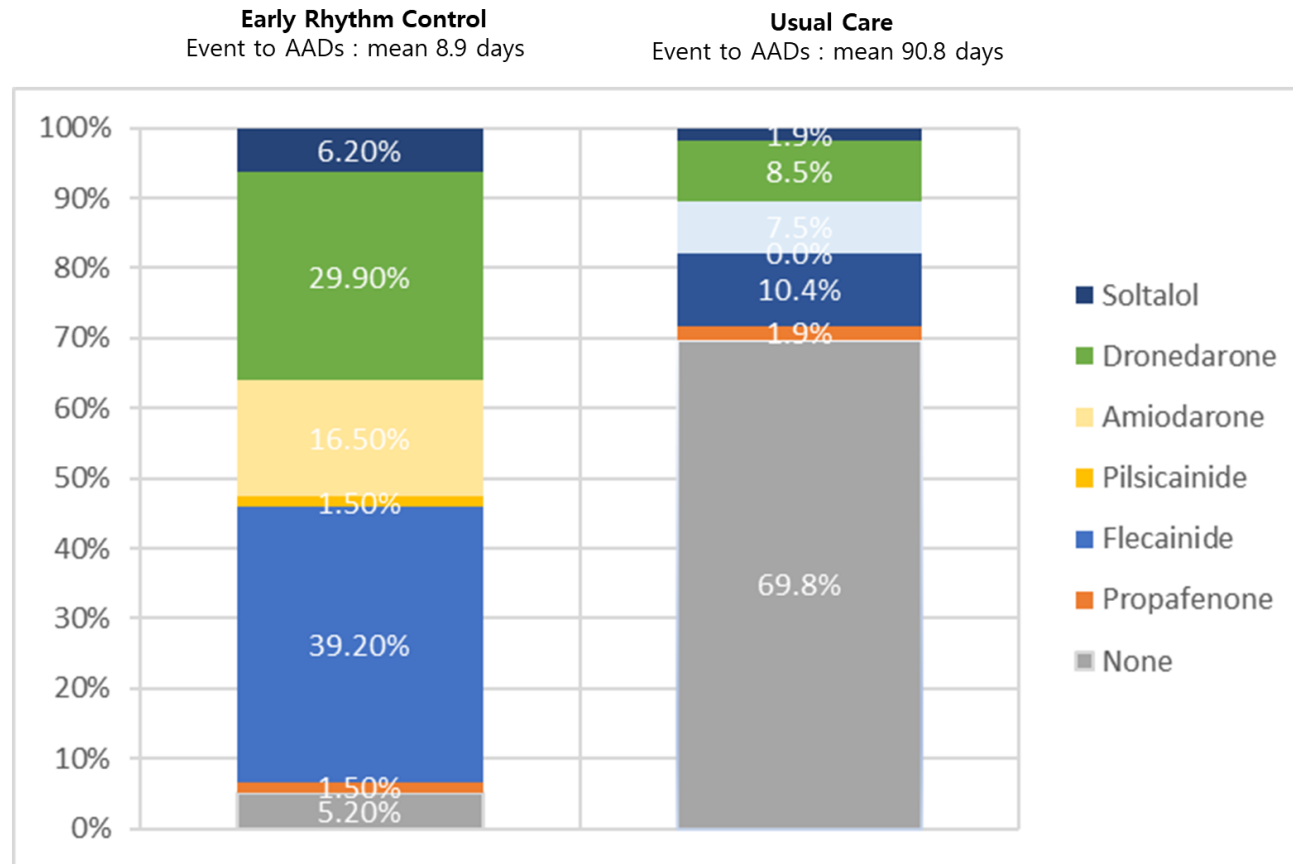



**Figure S2. (A) Subgroup analysis of the primary endpoint (recurrent IS within 12 months)**

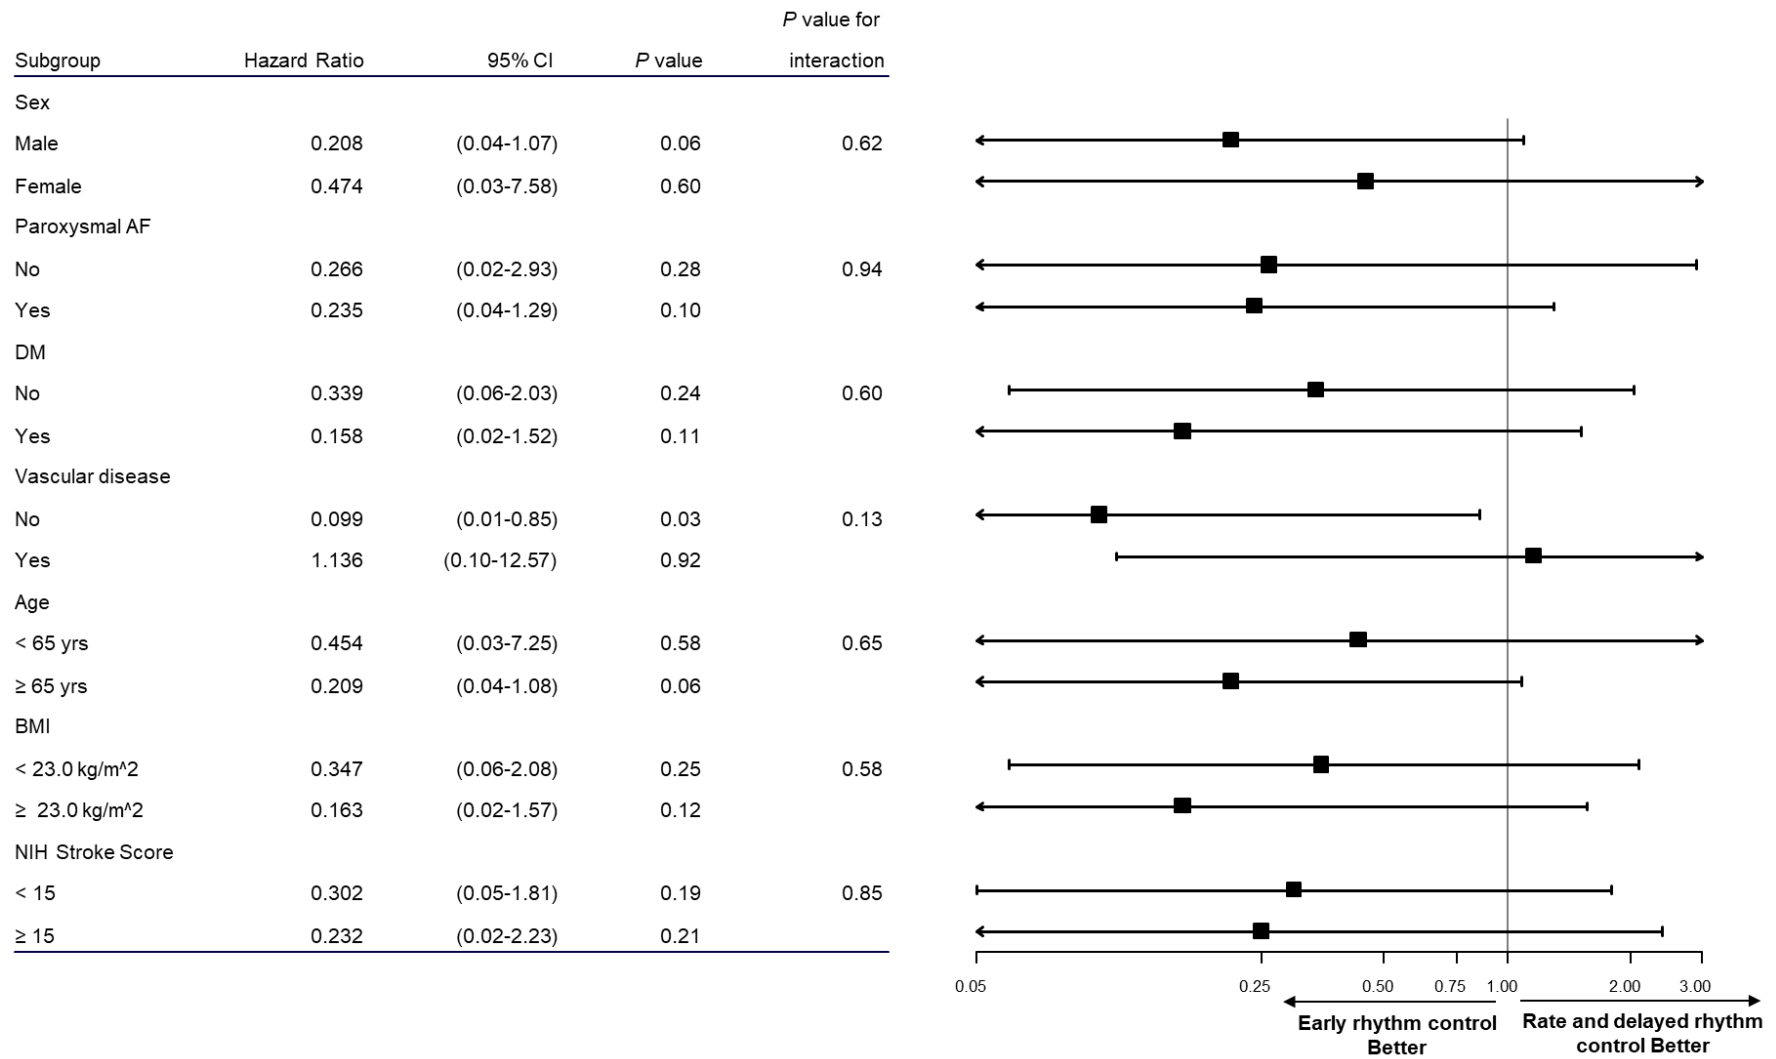

**Figure S2 (continued) (B) Subgroup analysis of the secondary endpoints (within 12 months)**

| Subgroup                       | Hazard Ratio | 95% CI       | P value | P value for interaction |
|--------------------------------|--------------|--------------|---------|-------------------------|
| Sex                            |              |              |         |                         |
| Male                           | 0.722        | (0.33-1.57)  | 0.41    | 0.63                    |
| Female                         | 0.994        | (0.34-2.91)  | 0.99    |                         |
| Paroxysmal AF                  |              |              |         |                         |
| No                             | 0.971        | (0.41-2.32)  | 0.95    | 0.54                    |
| Yes                            | 0.651        | (0.26-1.62)  | 0.36    |                         |
| NOAC                           |              |              |         |                         |
| No                             | 0.709        | (0.20-2.52)  | 0.60    | 0.90                    |
| Yes                            | 0.783        | (0.38-1.63)  | 0.51    |                         |
| HTN                            |              |              |         |                         |
| No                             | 1.712        | (0.37-7.93)  | 0.49    | 0.34                    |
| Yes                            | 0.727        | (0.35-1.51)  | 0.39    |                         |
| DM                             |              |              |         |                         |
| No                             | 1.196        | (0.52-2.75)  | 0.67    | 0.18                    |
| Yes                            | 0.474        | (0.17-1.35)  | 0.16    |                         |
| Vascular disease               |              |              |         |                         |
| No                             | 0.762        | (0.39-1.50)  | 0.43    | 0.34                    |
| Yes                            | 2.303        | (0.26-20.63) | 0.46    |                         |
| Age                            |              |              |         |                         |
| < 65 yrs                       | 1.165        | (0.23-6.00)  | 0.86    | 0.64                    |
| ≥ 65 yrs                       | 0.768        | (0.39-1.52)  | 0.45    |                         |
| BMI                            |              |              |         |                         |
| < 23.0 kg/m <sup>2</sup>       | 0.699        | (0.28-1.77)  | 0.45    | 0.67                    |
| ≥ 23.0 kg/m <sup>2</sup>       | 0.929        | (0.39-2.19)  | 0.87    |                         |
| eGFR                           |              |              |         |                         |
| ≥ 60 ml/min/1.73m <sup>2</sup> | 1.075        | (0.49-2.36)  | 0.86    | 0.29                    |
| < 60 ml/min/1.73m <sup>2</sup> | 0.490        | (0.15-1.61)  | 0.24    |                         |
| NIH Stroke Score               |              |              |         |                         |
| < 15                           | 1.088        | (0.42-2.83)  | 0.86    | 0.53                    |
| ≥ 15                           | 0.724        | (0.30-1.74)  | 0.47    |                         |

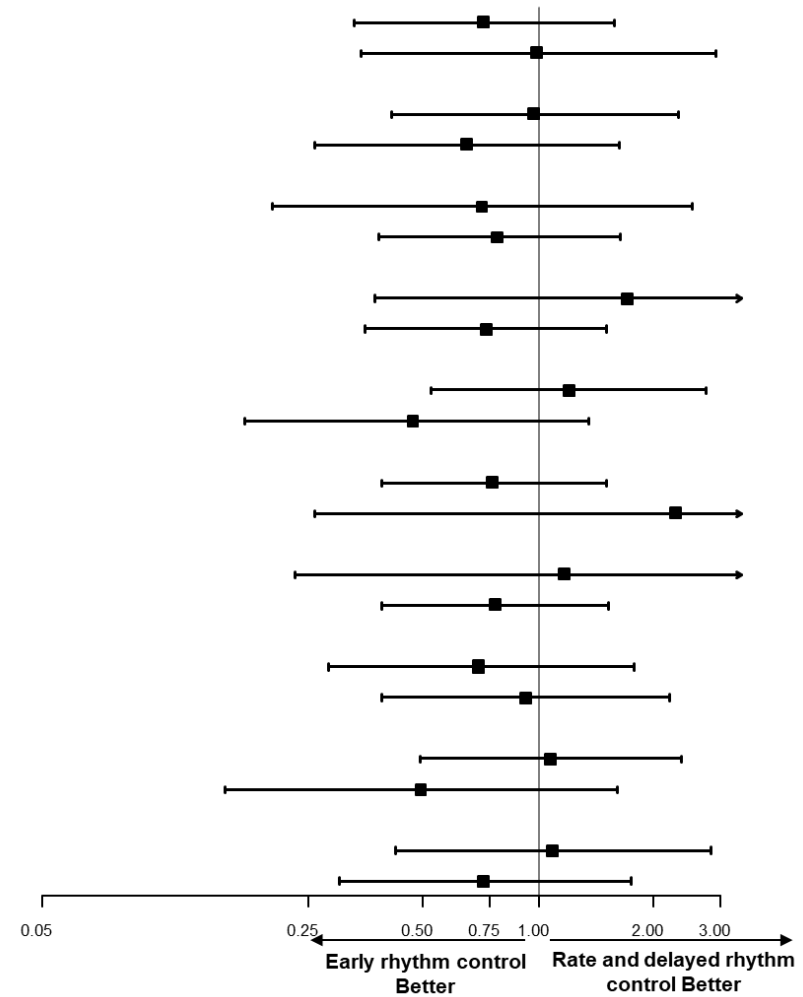

Supplement: JAH3-11-e023391-s001.pdf [file JAH3-11-e023391-s001.pdf]
